# Supplementary material for: Exercise-like effects by Estrogen-related receptor-gamma in muscle do not prevent insulin resistance in db/db mice
Source: PubMed Central journal article supplement (PMC4879541; doi:10.1038/srep26442), 2016-05-25
Supplement: srep26442-s1.pdf [file srep26442-s1.pdf]

## **SUPPLEMENTAL INFORMATION**

### **Exercise-like effects by Estrogen-related receptor-gamma in muscle do not prevent obesity and insulin resistance in db/db mice**

Pierre-Marie Badin<sup>1</sup>, Isabelle K. Vila<sup>3</sup>, Danesh H. Sopariwala<sup>1</sup>, Vikas Yadav<sup>1, 6</sup>, Sabina Lorca<sup>1</sup>, Katie Louche<sup>5</sup>, Eun Ran Kim<sup>1</sup>, Qingchun Tong<sup>1</sup>, Min Sup Song<sup>3, 4</sup>, Cedric Moro<sup>5</sup>, Vihang A. Narkar<sup>1, 2, 4, 7</sup>

<sup>1</sup> Metabolic and Degenerative Diseases, Institute of Molecular Medicine and <sup>2</sup> Integrative Biology and Pharmacology, The University of Texas Medical School at Houston; <sup>3</sup> Molecular and Cellular Oncology, The University of Texas MD Anderson Cancer Center, Houston; <sup>4</sup> Graduate School of Biomedical Sciences at The University of Texas Health Science Center at Houston; <sup>5</sup> Institut National de la Santé et de la Recherche Médicale, Inserm UMR 1048, Institute of Metabolic and Cardiovascular Diseases, and Paul Sabatier University, Toulouse, France; <sup>6</sup> **Current Address:** Indian Institute of Technology, Indore, India.

## **LIST OF CONTENTS**

**Supplemental Figure 1.** Overexpression of ERR $\gamma$  in db/db muscle.

**Supplemental Figure 2.** Mitochondrial content in db/db ERR $\gamma$  mice.

**Supplemental Figure 3.** Metabolic and mitochondrial gene expression.

**Supplemental Figure 4.** Respiratory Exchange Ratio (RER) measurement.

**Supplemental Figure 5.** p-AMPK expression in the muscle.

**Supplemental Table 1.** QPCR primer sequences.

## **FIGURE LEGENDS**

**Supplemental Figure 1. Overexpression of ERR $\gamma$  in db/db muscle. (A)** ERR $\gamma$  gene expression measured in gastrocnemius muscle of 6 month-old male mice. (N=4-6). **(B)** Protein expression of ERR $\gamma$  in gastrocnemius muscle of 6 month-old male mice (N=4-5). \* Indicates comparison to db/+ mice; † indicates db/db compared with db/db-ERR $\gamma$  mice. (\*/†p<0.05, \*\*\*p<0.001, One-way ANOVA with Tukey's post-hoc test.)

**Supplemental Figure 2. Mitochondrial content in db/db ERR $\gamma$  mice. (A)** Quantification of the western blots for mitochondrial complex proteins (N=4). **(B & C)** SDH and NADH-TR staining in medial TA muscles. **(B)** Representative images of the medial TA SDH and NADH-TR staining. **(C)** Percentage of myofibers in the medial TA stained positive for the SDH (N=5-6) and NADH-TR staining (N=4-6). \*Indicates comparison to db/+ mice; † indicates db/db compared with db/db-ERR $\gamma$  mice. (\*\*/††p<0.01, \*\*\*/†††p<0.001, One-way ANOVA with Tukey's post-hoc test.)

**Supplemental Figure 3. Metabolic and mitochondrial gene expression. (A- B)** Metabolic (A) and the mitochondrial (B) gene expression measured by QPCR. The data were obtained on gastrocnemius of 6 month-old fasted male mice (N=6-7). db/+, db/db and db/db-ERR $\gamma$  mice are represented by hatched, open and black bars, respectively. \* Indicates comparison to db/+ mice; † indicates db/db

compared with db/db-ERR $\gamma$  mice. (\*/ $\dagger$ p<0.05, \*\*/ $\dagger\dagger$ p<0.01, \*\*\*/ $\dagger\dagger\dagger$ p<0.001, One-way ANOVA with Tukey's post-hoc test).

**Supplemental Figure 4.** Respiratory Exchange Ratio (RER) measured in 5 month-old male db/db (open bars) and db/db-ERR $\gamma$  (black bars) mice.

**Supplemental Figure 5. P-AMPK expression in the muscle.** Activating phosphorylation of AMPK on residue Thr-172 measured in gastrocnemius muscles of 6 month old male mice (N=4). dB/+, db/db and db/db-ERR $\gamma$  mice are represented by hatched, open and black bars, respectively. \*Indicates comparison to db/+ mice;  $\dagger$  indicates db/db compared with db/db-ERR $\gamma$  mice. (\*/ $\dagger$ p<0.05, One-way ANOVA with Tukey's post-hoc test).

**Supplemental Table 1.** QPCR primer list.

# Supplemental Figure 1

(A)

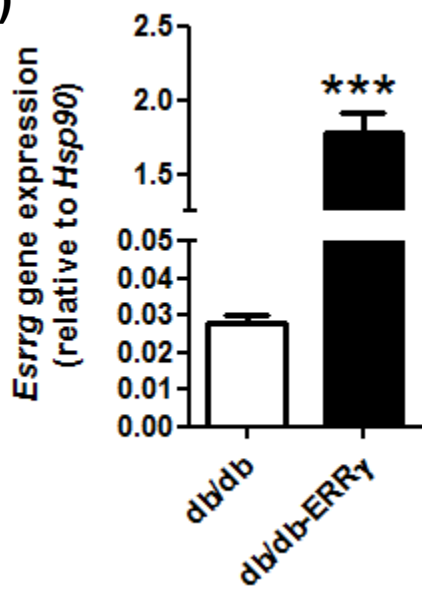

(B)

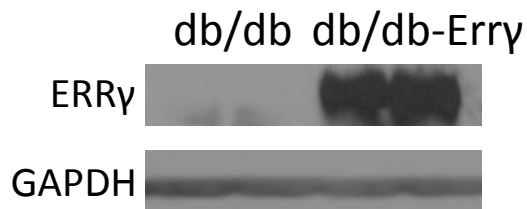

# Supplemental Figure 2

(A)

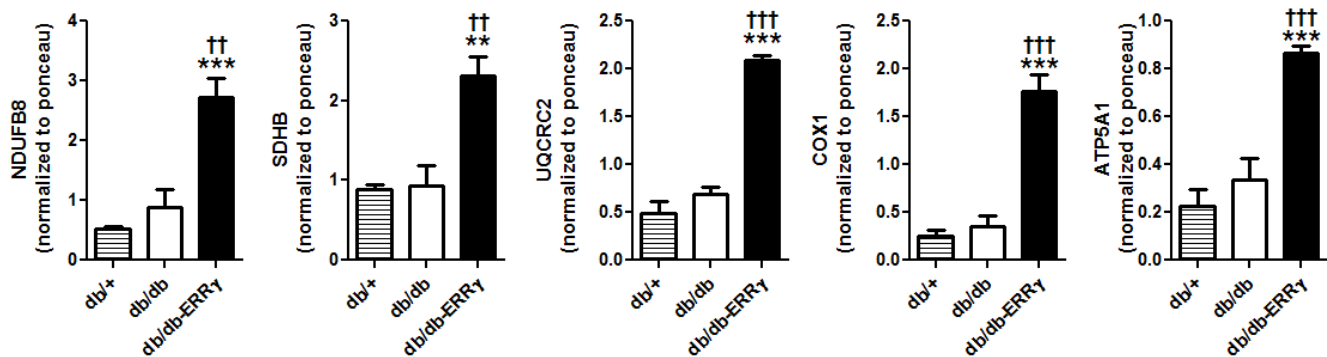

(B)

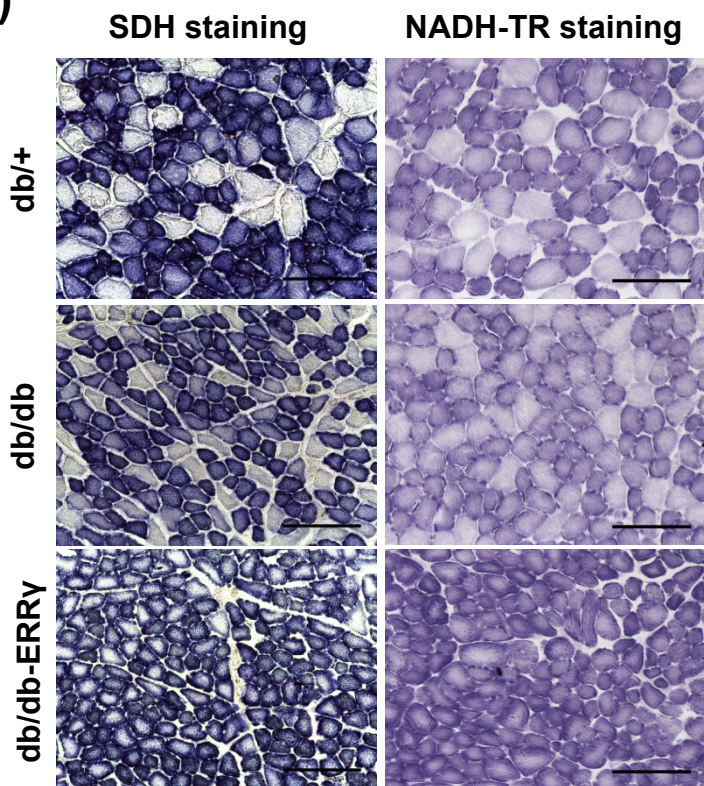

(C)

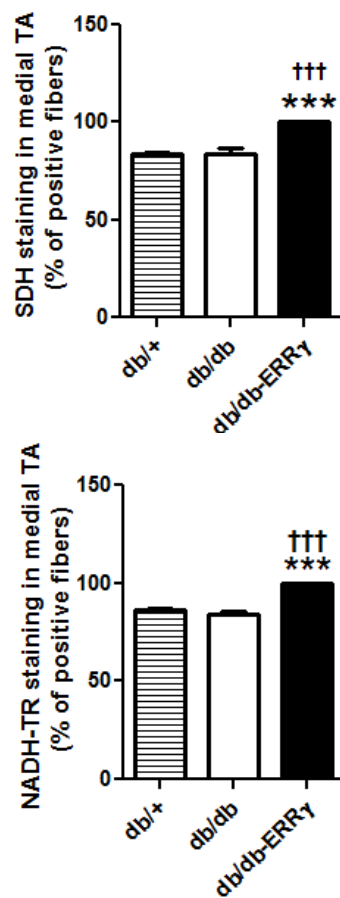

# Supplemental Figure 3

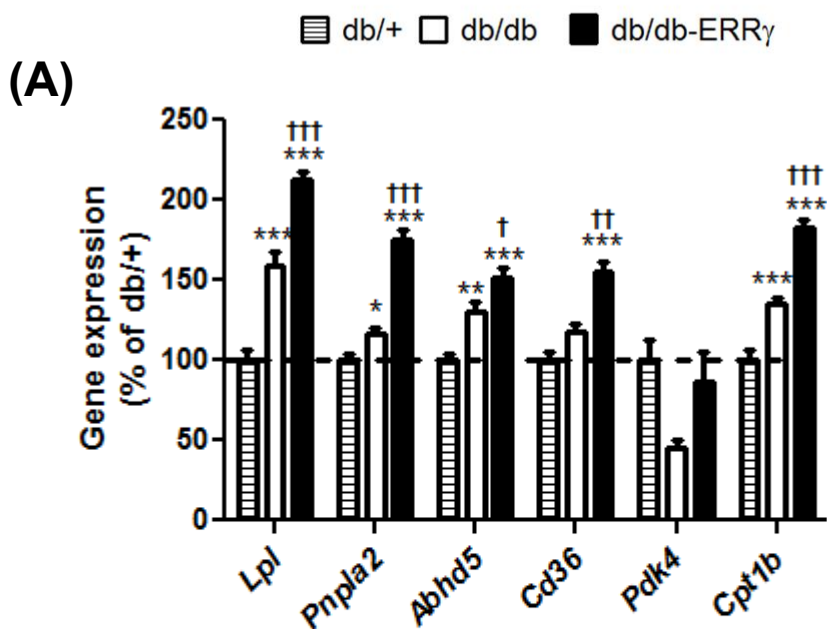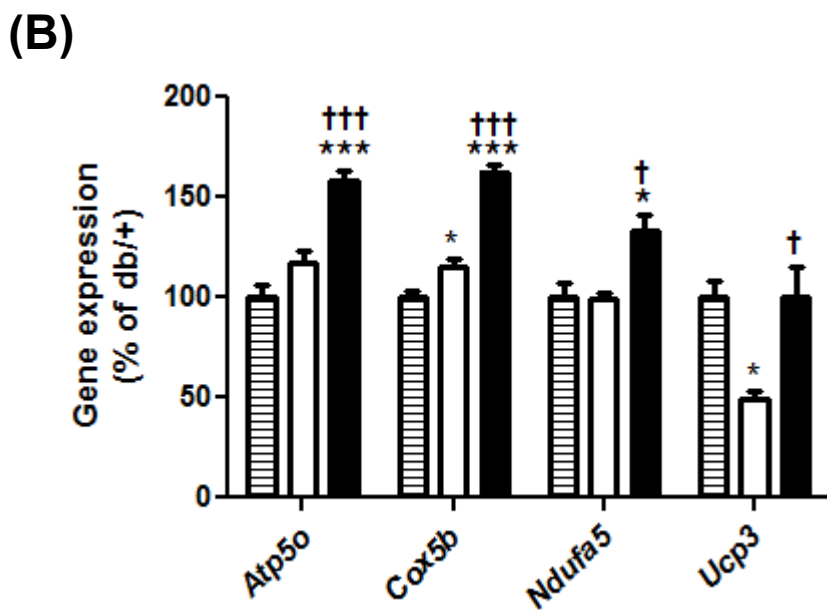

## Supplemental Figure 4

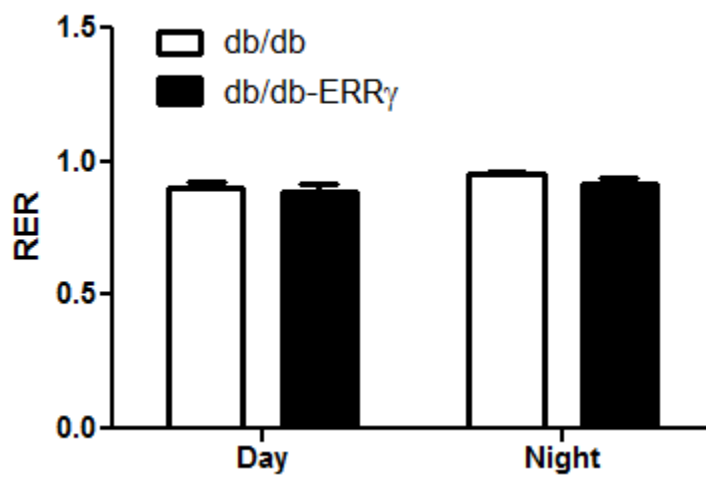

# Supplemental Figure 5

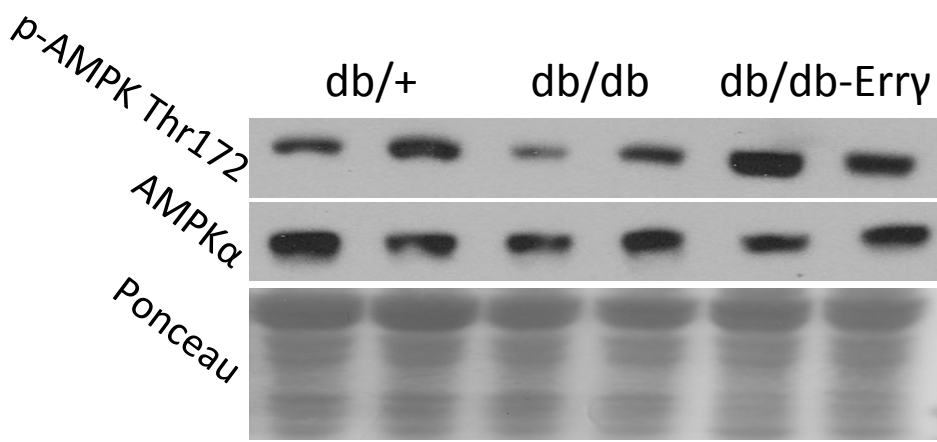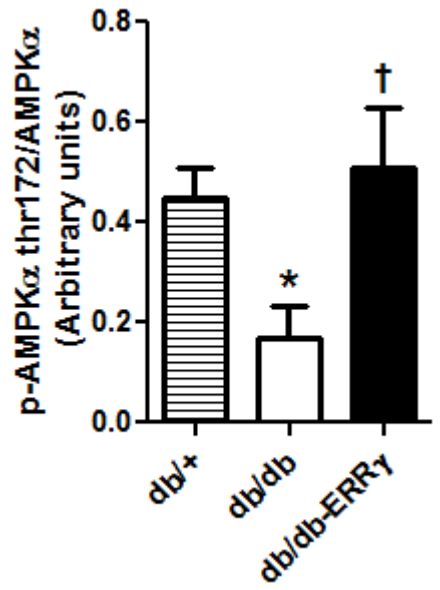



**SUPPLEMENTAL TABLE 1**

|               | Forward                       | Reverse                       |
|---------------|-------------------------------|-------------------------------|
| <i>Abhd5</i>  | 5'-TGACAGTGATGCGGAAGAAG-3'    | 5'-AGATCTGGTCGCTCAGGAAA-3'    |
| <i>Angpt1</i> | 5'-CATTCTTCGCTGCCATTCTG-3'    | 5'-GCACATTGCCCATGTTGAATC-3'   |
| <i>Angpt2</i> | 5'-GGTTGCTATCCGTAAAGAAGAGC-3' | 5'-GGGGAAGGTCAGTGTGTAGATG-3'  |
| <i>Atp5o</i>  | 5'-TCTCGACAGGTTCCGAGCTT-3'    | 5'-AGAGTACAGGGCGGTTGCATA-3'   |
| <i>CerS1</i>  | 5'-GCCACCACACACATCTTTCGG-3'   | 5'-GGAGCAGGTAAGCGCAGTAG-3'    |
| <i>CerS2</i>  | 5'-GAAGCCAGCTGGAGATTCAC-3'    | 5'-GACATCAGAGGCAATGCTGA-3'    |
| <i>CerS3</i>  | 5'-CTCTGGGAGGTTTGG AATGA-3'   | 5'-CAGGTGGTGGATGACATGAG-3'    |
| <i>CerS4</i>  | 5'-CCTGCTGGAGGTTTGTCTTC-3'    | 5'-GGCAAAGTGATCAGCAGTGA-3'    |
| <i>CerS5</i>  | 5'-ATTTATTGCCAAGCCCTGTG-3'    | 5'-AACCAGCATTGGATTTTTTCG-3'   |
| <i>CerS6</i>  | 5'-CTGAAGAACACGGAGGAAGC-3'    | 5'-TATGGCACATGGTTTGGCTA-3'    |
| <i>Cd36</i>   | 5'-CTGGGACCATTGGTGATGAAA-3'   | 5'-CACCCTCCAATCCCAAGTAAG-3'   |
| <i>Cox5b</i>  | 5'-GCTGCATCTGTGAAGAGGACAAC-3' | 5'-CAGCTTGTAATGGGTTCCACAGT-3' |
| <i>Cpt1b</i>  | 5'-GGGCACCCTCTGGGAGTTTGT-3'   | 5'-TGGCTCACCCACACAGTGT-3'     |
| <i>Esrrg</i>  | 5'-ACTTGGCTGACCGAGAGTTG-3'    | 5'-GCCAGGGACAGTGTGGAGAA-3'    |
| <i>Fgf1</i>   | 5'-GAAGCATGCGGAGAAGAAGT-3'    | 5'-CGAGGACCGCGCTTACAG-3'      |

|                     |                                |                                |
|---------------------|--------------------------------|--------------------------------|
| <i>Figf</i>         | 5'-AAATCGCGCACTCTGAGGA-3'      | 5'-TGGCAAGACTTTTGAGCTTCAA-3'   |
| <i>Gapdh</i>        | 5'-TGAAGCAGGCATCTGAGGG-3'      | 5'-CGAAGGTGGAAGAGTGGGAG-3'     |
| <i>Hsp90</i>        | 5'-GTCCGCCGTGTGTTTCATCAT-3'    | 5'-GCACTTCTTGACGATGTTCTTGC-3'  |
| <i>Lpl</i>          | 5'- GCTGGGCCTAACTTTGAGTATG-3'  | 5'- CAAAATCAGCGTCATCAGGAGAA-3' |
| <i>Myh1</i>         | 5'-CTCCAGGCTGCTTTAGAGGAA -3'   | 5'-CCTGCTCCTAATCTCAGCATCC-3'   |
| <i>Myh2</i>         | 5'-AATCTTACAAGAGACAAGCTGAGG-3' | 5'-TGCGGAACCTTGGATAGATTTG-3'   |
| <i>Myh4</i>         | 5'- GAAGAGCCGAGAGGTTACACAC-3'  | 5'- CAGGACAGTGACAAAGAACGTC-3'  |
| <i>Myh7</i>         | 5'-ACTGTCAACACTAAGAGGGTCA-3'   | 5'-TTGGATGATTTGATCTTCCAGGG-3'  |
| <i>Ndufa5</i>       | 5'-AGCTGGATATGGTCAAGGCG -3'    | 5'- TGCTAACCAGTGAAGTGGC -3'    |
| <i>Pdk4</i>         | 5'-AAGCAAAACACAAACACGAGTA-3'   | 5'- CCCGGGTCATCCAACCA-3'       |
| <i>Pnpla2</i>       | 5'- CAACGCCACTCACATCTACGG -3'  | 5'- GGACACCTCAATAATGTTGGCA -3' |
| <i>Ucp3</i>         | 5'-GAGATGGTGACCTACGACATCA-3'   | 5'-GCGTTCATGTATCGGGTCTTTA-3'   |
| <i>Vegfa</i><br>121 | 5'- TGCAGGCTGCTGTAACGATG-3'    | 5'- CCTTGGCTTGTACATTTTTTCT-3'  |
| <i>Vegfa</i><br>165 | 5'- TGCAGGCTGCTGTAACGATG-3'    | 5'-GAACAAGGCTCACAGTGATTTTCT-3' |
| <i>Vegfa</i><br>189 | 5'- TGCAGGCTGCTGTAACGATG-3'    | 5'- CTCCAGGATTTAAACCGGGATT-3'  |

|              |                               |                               |
|--------------|-------------------------------|-------------------------------|
| <i>Vegfb</i> | 5'- TGCCATGGATAGACGTTTATGC-3' | 5'- TGCTCAGAGGCACCACCAC-3'    |
| <i>Vegfc</i> | 5'- AAGACCGTGTGCGAATCGA-3'    | 5'- CACAGCGGCATACTTCTTCACT-3' |
